# Supplementary material for: Bioengineered probiotics derived bacterial extracellular vesicle as bioactive nanocarrier for the local VEGF expression to accelerate wound healing
Source: Research Square preprint supplement (doi:10.21203/rs.3.rs-8711594/v1), 2026-02-03
Supplement: Supplementary file 1 [file 5fbeeda5b8a24ab8f8f723e8.docx]

**Supplementary Information for**

**Bioengineered probiotics derived bacterial extracellular vesicle as bioactive nanocarrier for the local VEGF expression to accelerate wound healing**

Zelin Zheng1,2,3,4#, Xi Liu5#, Kailu Guo5#, Shaojie Wu1,2,3,4, Wenchen Cai6, Yuting Li1,2,3,4, Yirong Wang1,2,3,4, Cuiping Zhang5*, Honggang Hu3,4,7*, Yejiao Shi1,2,3*

1 Institute of Translational Medicine, Shanghai University, Shanghai 200444, China

2 National Center for Translational Medicine (Shanghai) SHU Branch, Shanghai University, Shanghai 200444, China

3 MedEng-X Institutes, Shanghai University, Shanghai 200444, China

4 School of Medicine, Shanghai University, Shanghai 200444, China

5 Medical Innovation Research Department, PLA General Hospital and PLA Medical College, Beijing, China

6 Faculty of Chinese Medicine, Macau University of Science and Technology, Macau, China

7 School of Pharmacy, Chengdu Medical College, Chengdu 610083, China

# These authors contributed equally to this work

*Corresponding authors: [sh10yj@shu.edu.cn](mailto:sh10yj@shu.edu.cn) (Yejiao Shi); [hhu66@shu.edu.cn](mailto:hhu66@shu.edu.cn) (Honggang Hu); [zcp666666@sohu.com](mailto:zcp666666@sohu.com) (Cuiping Zhang)

**Table S1. The optimized sequence of VEGF.**

| **Name** | **Sequence** |
| --- | --- |
| **VEGF-A** | atgaattttctgctgagctgggtgcattggagcctggccctgctgctgtatctgcatcatgccaaatggagccaggccgccccgatggccgaaggtggtggtcagaatcatcatgaagtggtgaaatttatggatgtgtatcagcgtagctattgtcatccgattgaaaccctggtggatatttttcaggaatatccggatgaaattgaatatatttttaaaccgagctgtgtgccgctgatgcgttgtggtggttgttgtaatgatgaaggcctggaatgtgtgccgaccgaagaaagcaatattaccatgcagattatgcgtattaaaccgcatcagggtcagcatattggtgaaatgagctttctgcagcataataaatgtgaatgtcgtccgaaaaaagatcgtgcccgccaggaaaagaaaagcgtgcgtggtaaaggtaaaggtcagaaacgtaaacgtaagaaaagccgttataaaagctggagcgtgtatgtgggtgcccgttgttgtctgatgccgtggagcctgccgggtccgcatccgtgtggcccgtgtagcgaacgtcgtaaacatctttttgtgcaggatccgcagacctgtaaatgtagctgtaaaaataccgatagccgttgtaaagcccgtcagctggaactgaatgaacgtacctgtcgttgtgataaaccgcgtcgttaa |

**Table S2. The optimized sequence of pVEGF.**

| **Name** | **Sequence** |
| --- | --- |
| **pVEGF** | AAGTATGCAAAGCATGCATCTCAATTAGTCAGCAACCATAGTCCCGCCCCTAACTCCGCCCATCCCGCCCCTAACTCCGCCCAGTTCCGCCCATTCTCCGCCCCATGGCTGACTAATTTTTTTTATTTATGCAGAGGCCGAGGCCGCCTCGGCCTCTGAGCTATTCCAGAAGTAGTGAGGAGGCTTTTTTGGAGGCCTAGGCTTTTGCAAAGATCGATCAAGAGACAGGATGAGGATCGTTTCGCATGATTGAACAAGATGGATTGCACGCAGGTTCTCCGGCCGCTTGGGTGGAGAGGCTATTCGGCTATGACTGGGCACAACAGACAATCGGCTGCTCTGATGCCGCCGTGTTCCGGCTGTCAGCGCAGGGGCGCCCGGTTCTTTTTGTCAAGACCGACCTGTCCGGTGCCCTGAATGAACTGCAAGACGAGGCAGCGCGGCTATCGTGGCTGGCCACGACGGGCGTTCCTTGCGCAGCTGTGCTCGACGTTGTCACTGAAGCGGGAAGGGACTGGCTGCTATTGGGCGAAGTGCCGGGGCAGGATCTCCTGTCATCTCACCTTGCTCCTGCCGAGAAAGTATCCATCATGGCTGATGCAATGCGGCGGCTGCATACGCTTGATCCGGCTACCTGCCCATTCGACCACCAAGCGAAACATCGCATCGAGCGAGCACGTACTCGGATGGAAGCCGGTCTTGTCGATCAGGATGATCTGGACGAAGAGCATCAGGGGCTCGCGCCAGCCGAACTGTTCGCCAGGCTCAAGGCGAGCATGCCCGACGGCGAGGATCTCGTCGTGACCCATGGCGATGCCTGCTTGCCGAATATCATGGTGGAAAATGGCCGCTTTTCTGGATTCATCGACTGTGGCCGGCTGGGTGTGGCGGACCGCTATCAGGACATAGCGTTGGCTACCCGTGATATTGCTGAAGAGCTTGGCGGCGAATGGGCTGACCGCTTCCTCGTGCTTTACGGTATCGCCGCTCCCGATTCGCAGCGCATCGCCTTCTATCGCCTTCTTGACGAGTTCTTCTGAGCGGGACTCTGGGGTTCGAAATGACCGACCAAGCGACGCCCAACCTGCCATCACGAGATTTCGATTCCACCGCCGCCTTCTATGAAAGGTTGGGCTTCGGAATCGTTTTCCGGGACGCCGGCTGGATGATCCTCCAGCGCGGGGATCTCATGCTGGAGTTCTTCGCCCACCCTAGGGGGAGGCTAACTGAAACACGGAAGGAGACAATACCGGAAGGAACCCGCGCTATGACGGCAATAAAAAGACAGAATAAAACGCACGGTGTTGGGTCGTTTGTTCATAAACGCGGGGTTCGGTCCCAGGGCTGGCACTCTGTCGATACCCCACCGAGACCCCATTGGGGCCAATACGCCCGCGTTTCTTCCTTTTCCCCACCCCACCCCCCAAGTTCGGGTGAAGGCCCAGGGCTCGCAGCCAACGTCGGGGCGGCAGGCCCTGCCATAGCCTCAGGTTACTCATATATACTTTAGATTGATTTAAAACTTCATTTTTAATTTAAAAGGATCTAGGTGAAGATCCTTTTTGATAATCTCATGACCAAAATCCCTTAACGTGAGTTTTCGTTCCACTGAGCGTCAGACCCCGTAGAAAAGATCAAAGGATCTTCTTGAGATCCTTTTTTTCTGCGCGTAATCTGCTGCTTGCAAACAAAAAAACCACCGCTACCAGCGGTGGTTTGTTTGCCGGATCAAGAGCTACCAACTCTTTTTCCGAAGGTAACTGGCTTCAGCAGAGCGCAGATACCAAATACTGTTCTTCTAGTGTAGCCGTAGTTAGGCCACCACTTCAAGAACTCTGTAGCACCGCCTACATACCTCGCTCTGCTAATCCTGTTACCAGTGGCTGCTGCCAGTGGCGATAAGTCGTGTCTTACCGGGTTGGACTCAAGACGATAGTTACCGGATAAGGCGCAGCGGTCGGGCTGAACGGGGGGTTCGTGCACACAGCCCAGCTTGGAGCGAACGACCTACACCGAACTGAGATACCTACAGCGTGAGCTATGAGAAAGCGCCACGCTTCCCGAAGGGAGAAAGGCGGACAGGTATCCGGTAAGCGGCAGGGTCGGAACAGGAGAGCGCACGAGGGAGCTTCCAGGGGGAAACGCCTGGTATCTTTATAGTCCTGTCGGGTTTCGCCACCTCTGACTTGAGCGTCGATTTTTGTGATGCTCGTCAGGGGGGCGGAGCCTATGGAAAAACGCCAGCAACGCGGCCTTTTTACGGTTCCTGGCCTTTTGCTGGCCTTTTGCTCACATGTTCTTTCCTGCGTTATCCCCTGATTCTGTGGATAACCGTATTACCGCCATGCATTAGTTATTAATAGTAATCAATTACGGGGTCATTAGTTCATAGCCCATATATGGAGTTCCGCGTTACATAACTTACGGTAAATGGCCCGCCTGGCTGACCGCCCAACGACCCCCGCCCATTGACGTCAATAATGACGTATGTTCCCATAGTAACGCCAATAGGGACTTTCCATTGACGTCAATGGGTGGAGTATTTACGGTAAACTGCCCACTTGGCAGTACATCAAGTGTATCATATGCCAAGTACGCCCCCTATTGACGTCAATGACGGTAAATGGCCCGCCTGGCATTATGCCCAGTACATGACCTTATGGGACTTTCCTACTTGGCAGTACATCTACGTATTAGTCATCGCTATTACCATGGTGATGCGGTTTTGGCAGTACATCAATGGGCGTGGATAGCGGTTTGACTCACGGGGATTTCCAAGTCTCCACCCCATTGACGTCAATGGGAGTTTGTTTTGGCACCAAAATCAACGGGACTTTCCAAAATGTCGTAACAACTCCGCCCCATTGACGCAAATGGGCGGTAGGCGTGTACGGTGGGAGGTCTATATAAGCAGAGCTGGTTTAGTGAACCGTCAGATCCGCTAGCATGAATTTTCTGCTGAGCTGGGTGCATTGGAGCCTGGCCCTGCTGCTGTATCTGCATCATGCCAAATGGAGCCAGGCCGCCCCGATGGCCGAAGGTGGTGGTCAGAATCATCATGAAGTGGTGAAATTTATGGATGTGTATCAGCGTAGCTATTGTCATCCGATTGAAACCCTGGTGGATATTTTTCAGGAATATCCGGATGAAATTGAATATATTTTTAAACCGAGCTGTGTGCCGCTGATGCGTTGTGGTGGTTGTTGTAATGATGAAGGCCTGGAATGTGTGCCGACCGAAGAAAGCAATATTACCATGCAGATTATGCGTATTAAACCGCATCAGGGTCAGCATATTGGTGAAATGAGCTTTCTGCAGCATAATAAATGTGAATGTCGTCCGAAAAAAGATCGTGCCCGCCAGGAAAAGAAAAGCGTGCGTGGTAAAGGTAAAGGTCAGAAACGTAAACGTAAGAAAAGCCGTTATAAAAGCTGGAGCGTGTATGTGGGTGCCCGTTGTTGTCTGATGCCGTGGAGCCTGCCGGGTCCGCATCCGTGTGGCCCGTGTAGCGAACGTCGTAAACATCTTTTTGTGCAGGATCCGCAGACCTGTAAATGTAGCTGTAAAAATACCGATAGCCGTTGTAAAGCCCGTCAGCTGGAACTGAATGAACGTACCTGTCGTTGTGATAAACCGCGTCGTTAAGAATTCTGCAGTCGACGGTACCGCGGGCCCGGGATCCACCGGATCTAGATAACTGATCATAATCAGCCATACCACATTTGTAGAGGTTTTACTTGCTTTAAAAAACCTCCCACACCTCCCCCTGAACCTGAAACATAAAATGAATGCAATTGTTGTTGTTAACTTGTTTATTGCAGCTTATAATGGTTACAAATAAAGCAATAGCATCACAAATTTCACAAATAAAGCATTTTTTTCACTGCATTCTAGTTGTGGTTTGTCCAAACTCATCAATGTATCTTAACGCGTAAATTGTAAGCGTTAATATTTTGTTAAAATTCGCGTTAAATTTTTGTTAAATCAGCTCATTTTTTAACCAATAGGCCGAAATCGGCAAAATCCCTTATAAATCAAAAGAATAGACCGAGATAGGGTTGAGTGTTGTTCCAGTTTGGAACAAGAGTCCACTATTAAAGAACGTGGACTCCAACGTCAAAGGGCGAAAAACCGTCTATCAGGGCGATGGCCCACTACGTGAACCATCACCCTAATCAAGTTTTTTGGGGTCGAGGTGCCGTAAAGCACTAAATCGGAACCCTAAAGGGAGCCCCCGATTTAGAGCTTGACGGGGAAAGCCGGCGAACGTGGCGAGAAAGGAAGGGAAGAAAGCGAAAGGAGCGGGCGCTAGGGCGCTGGCAAGTGTAGCGGTCACGCTGCGCGTAACCACCACACCCGCCGCGCTTAATGCGCCGCTACAGGGCGCGTCAGGTGGCACTTTTCGGGGAAATGTGCGCGGAACCCCTATTTGTTTATTTTTCTAAATACATTCAAATATGTATCCGCTCATGAGACAATAACCCTGATAAATGCTTCAATAATATTGAAAAAGGAAGAGTCCTGAGGCGGAAAGAACCAGCTGTGGAATGTGTGTCAGTTAGGGTGTGGAAAGTCCCCAGGCTCCCCAGCAGGCAGAAGTATGCAAAGCATGCATCTCAATTAGTCAGCAACCAGGTGTGGAAAGTCCCCAGGCTCCCCAGCAGGCAG |

**Table S3. The sequence of primers used for PCR.**

| **Primer Name** | **Sequence** |
| --- | --- |
| miR-21-5p-F | GCGCGTAGCTTATCAGACTGA |
| miR-21-5p-R | ATCCAGTGCAGGGTCCGAGG |
| U6-F | CTCGCTTCGGCAGCACA |
| U6-R | AACGCTTCACGAATTTGCGT |


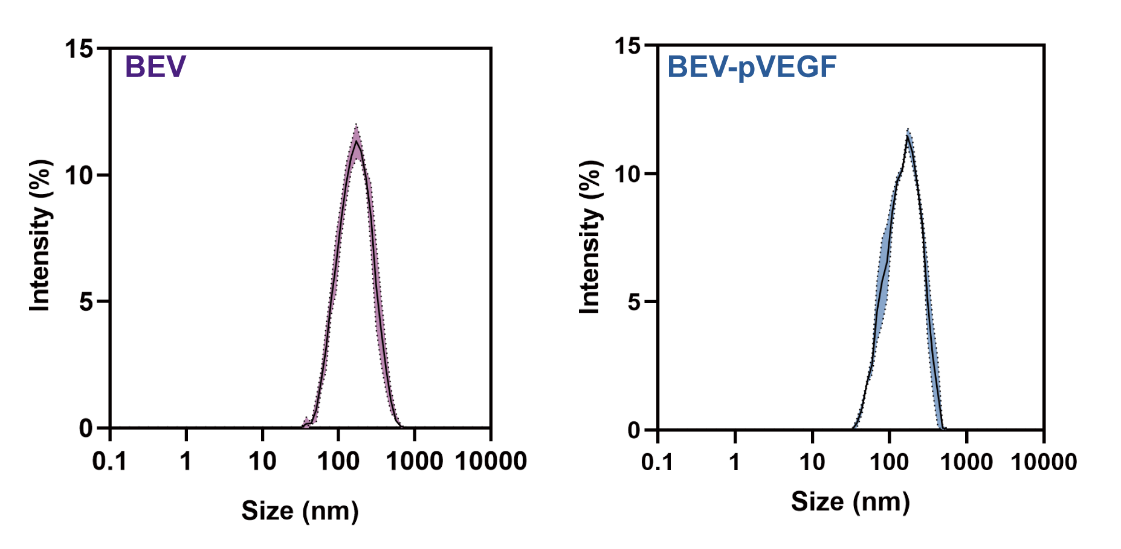


**Figure S1.** The size distribution of BEV and BEV-pVEGF that analyzed by DLS.


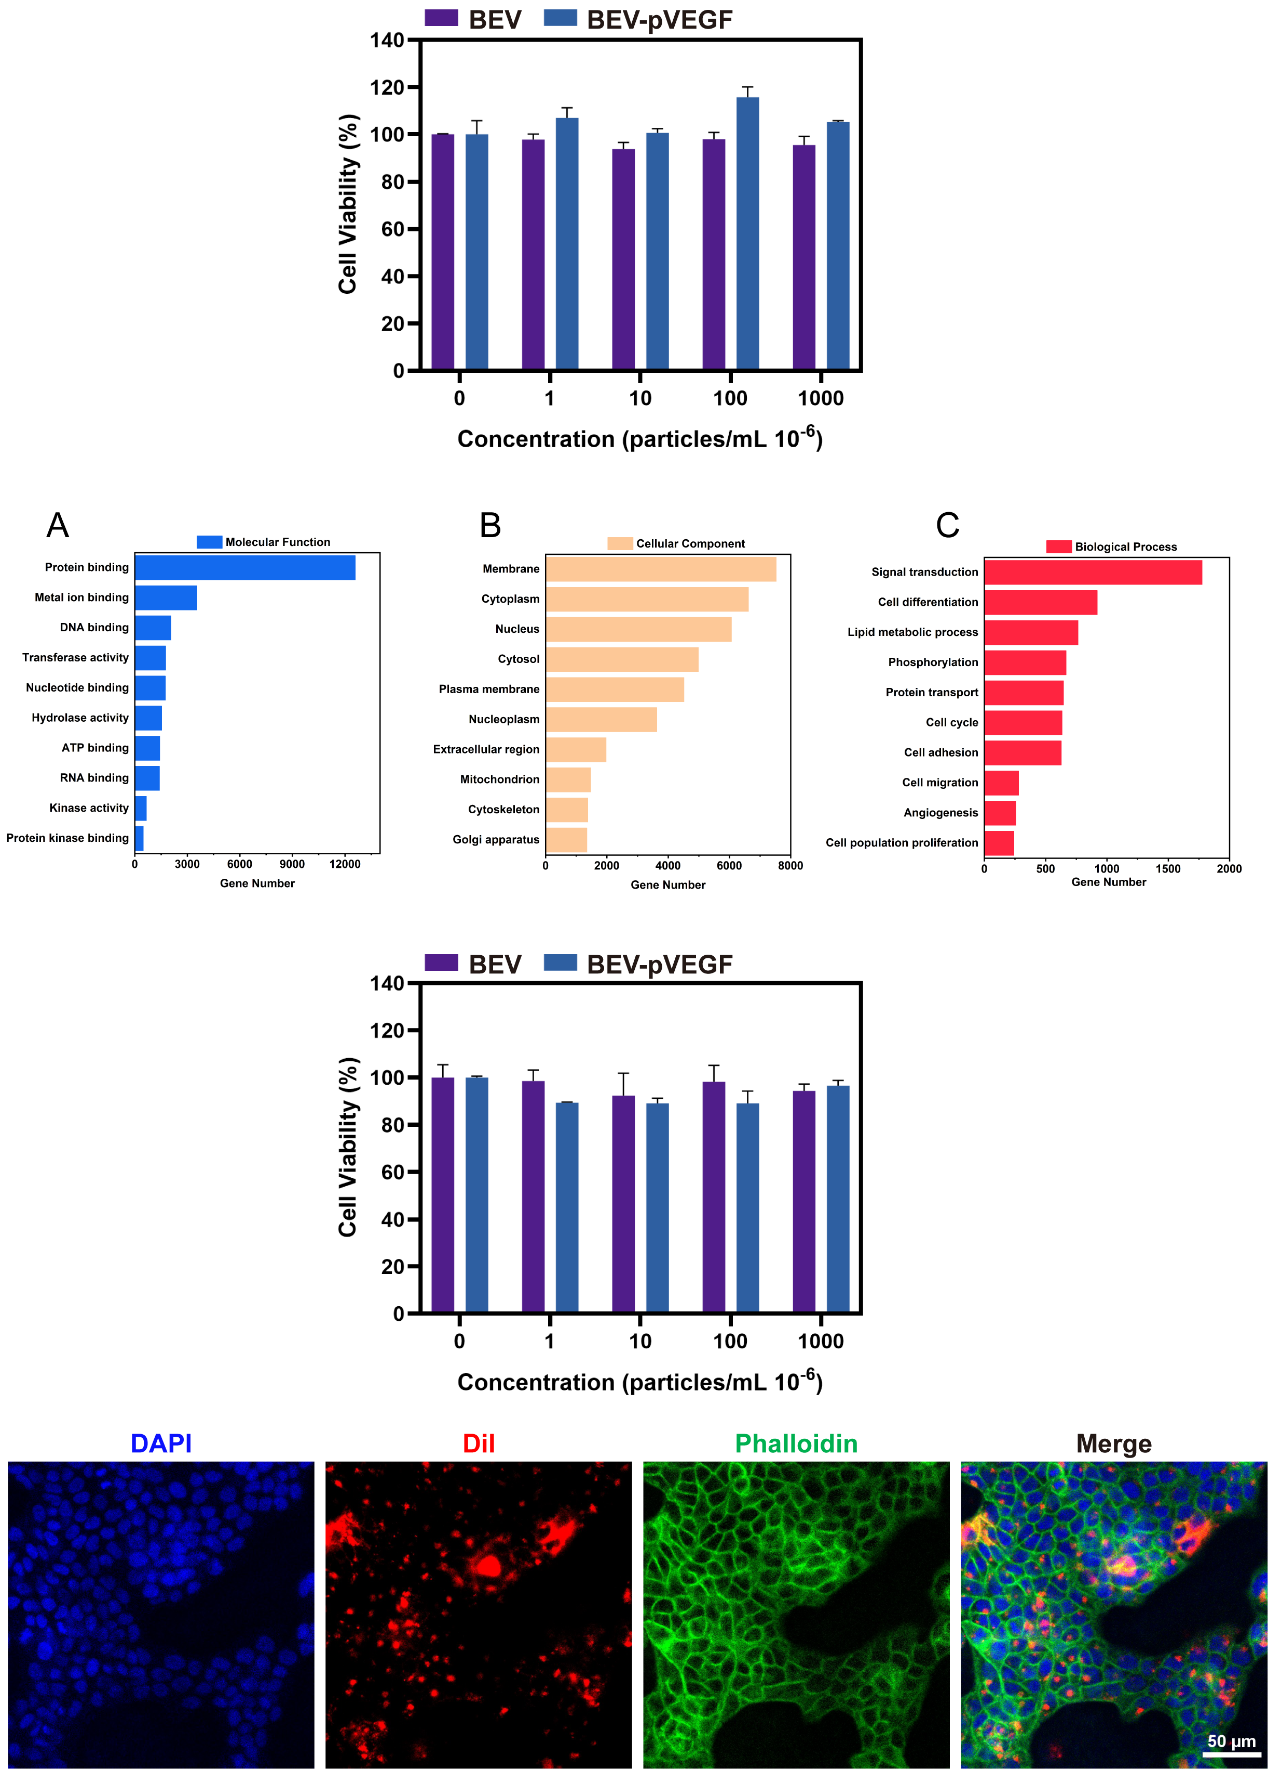


**Figure S2.** The cell viability of HUVEC with the treatment of BEV and BEV-pVEGF at varied concentrations ranging from 1×106-1×109 particles/mL.


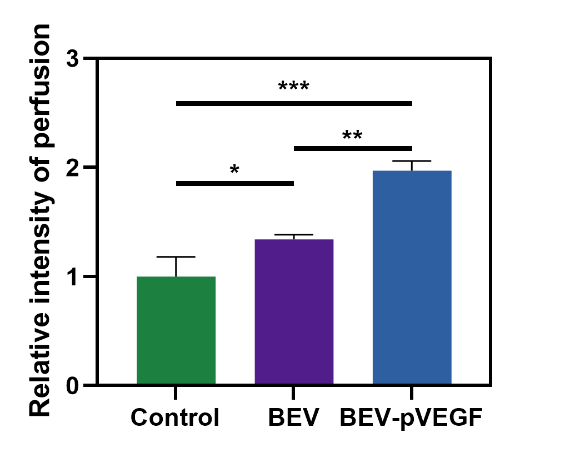


**Figure S3.** Quantification on the intensity of blood perfusion around the wound site after the treatment with PBS, BEV, or BEV-pVEGF for 7 days.


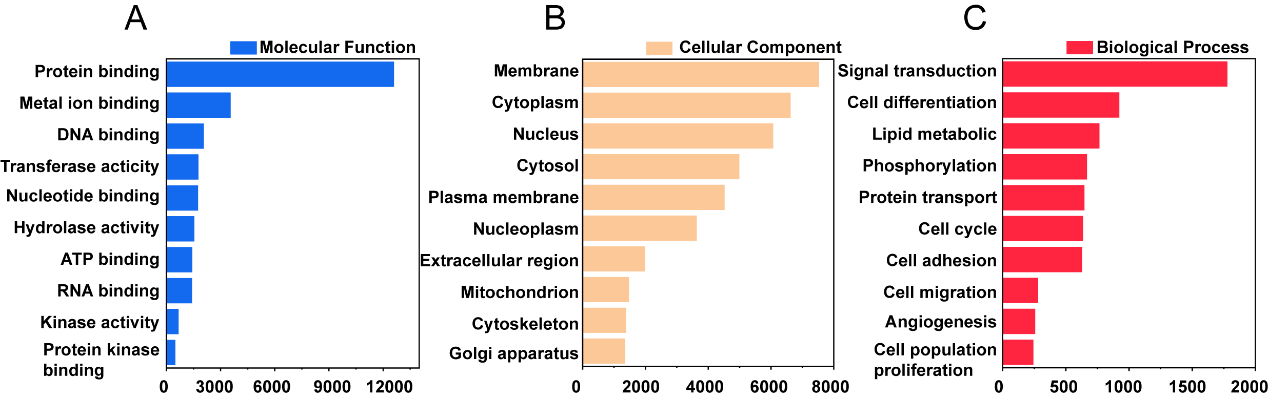


**Figure S4**. GO analyses on the molecular function (A), cellular component (B), and biological process (C) of the top 5 significantly contained wound healing miRNA in both BEV and BEV-pVEGF.


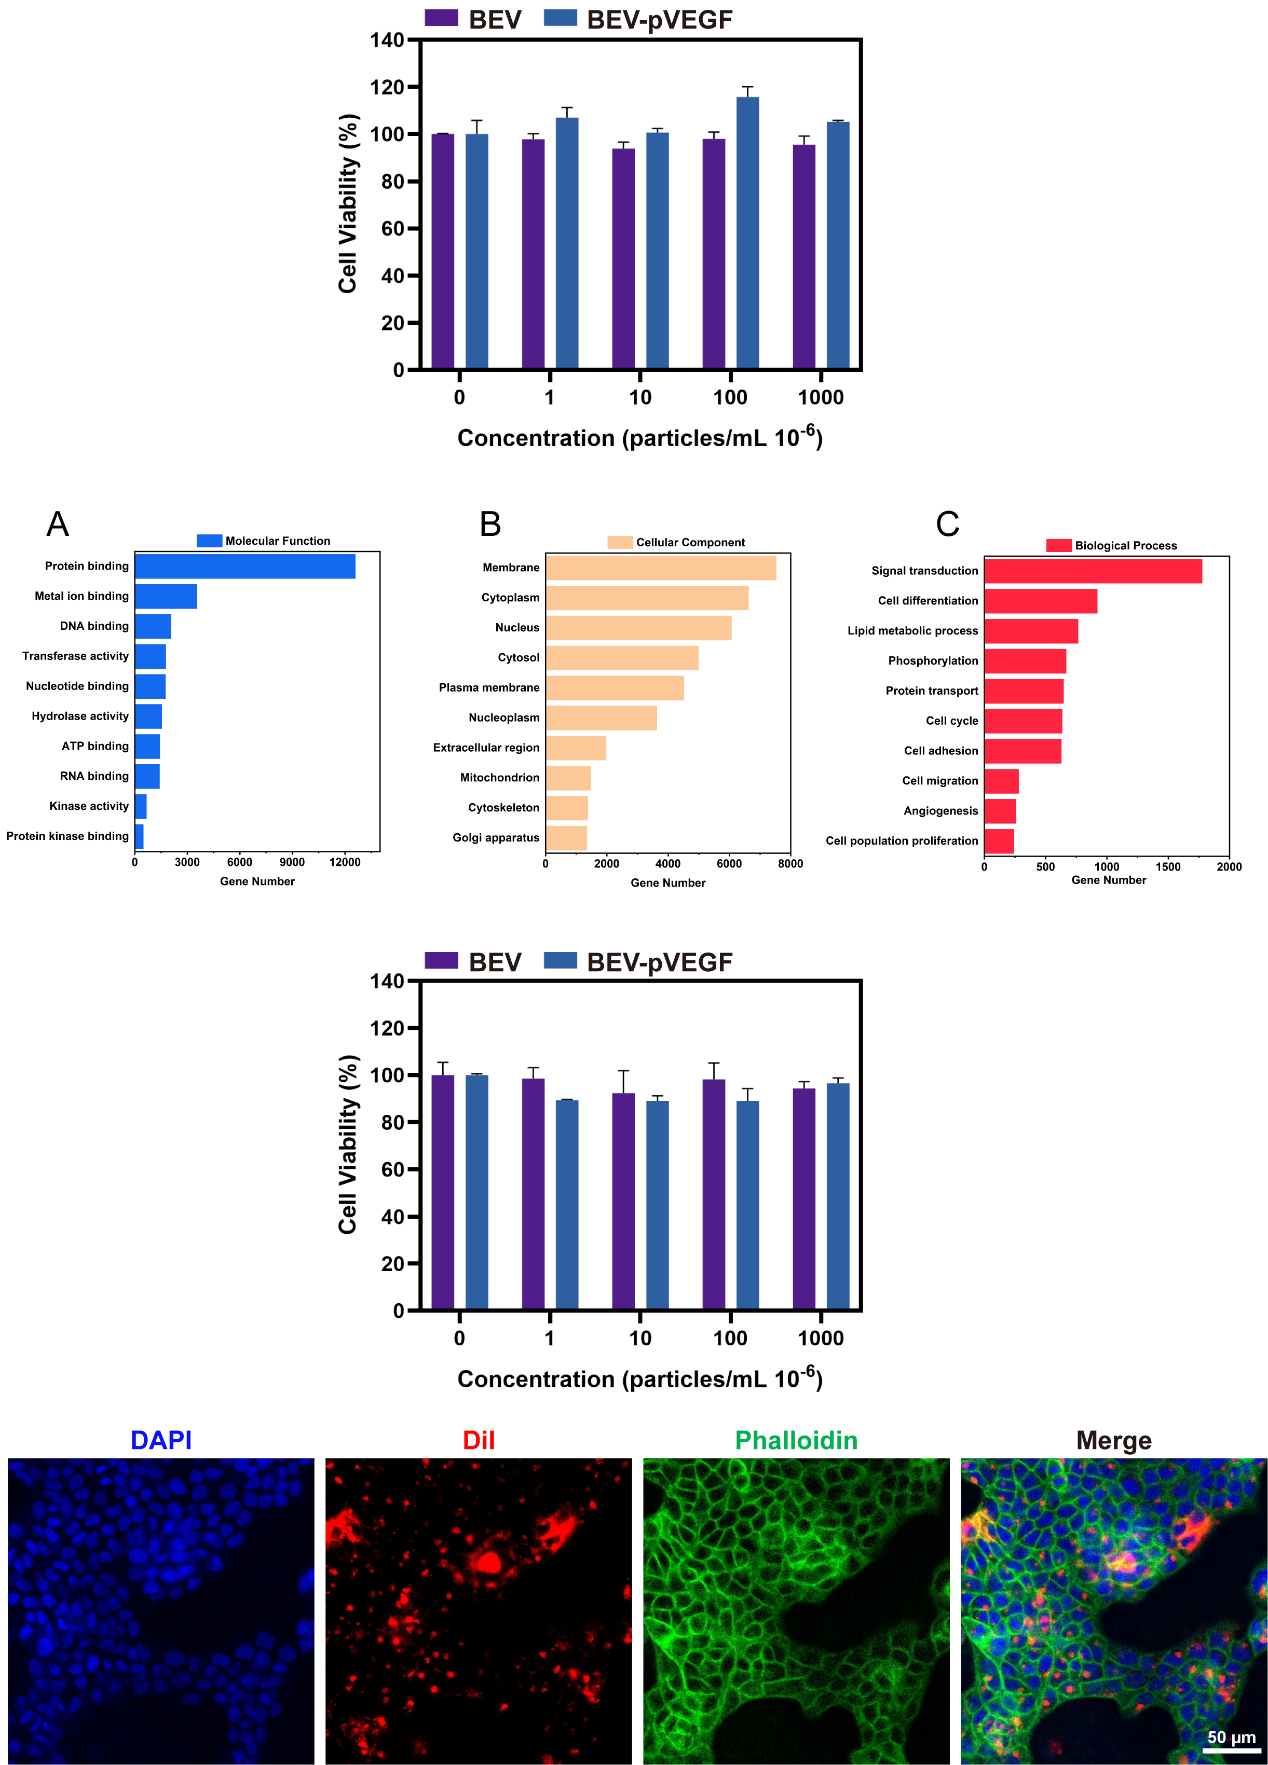


**Figure S5**. The cell viability of HaCaT with the treatment of BEV and BEV-pVEGF at varied concentrations ranging from 1×106-1×109 particles/mL.


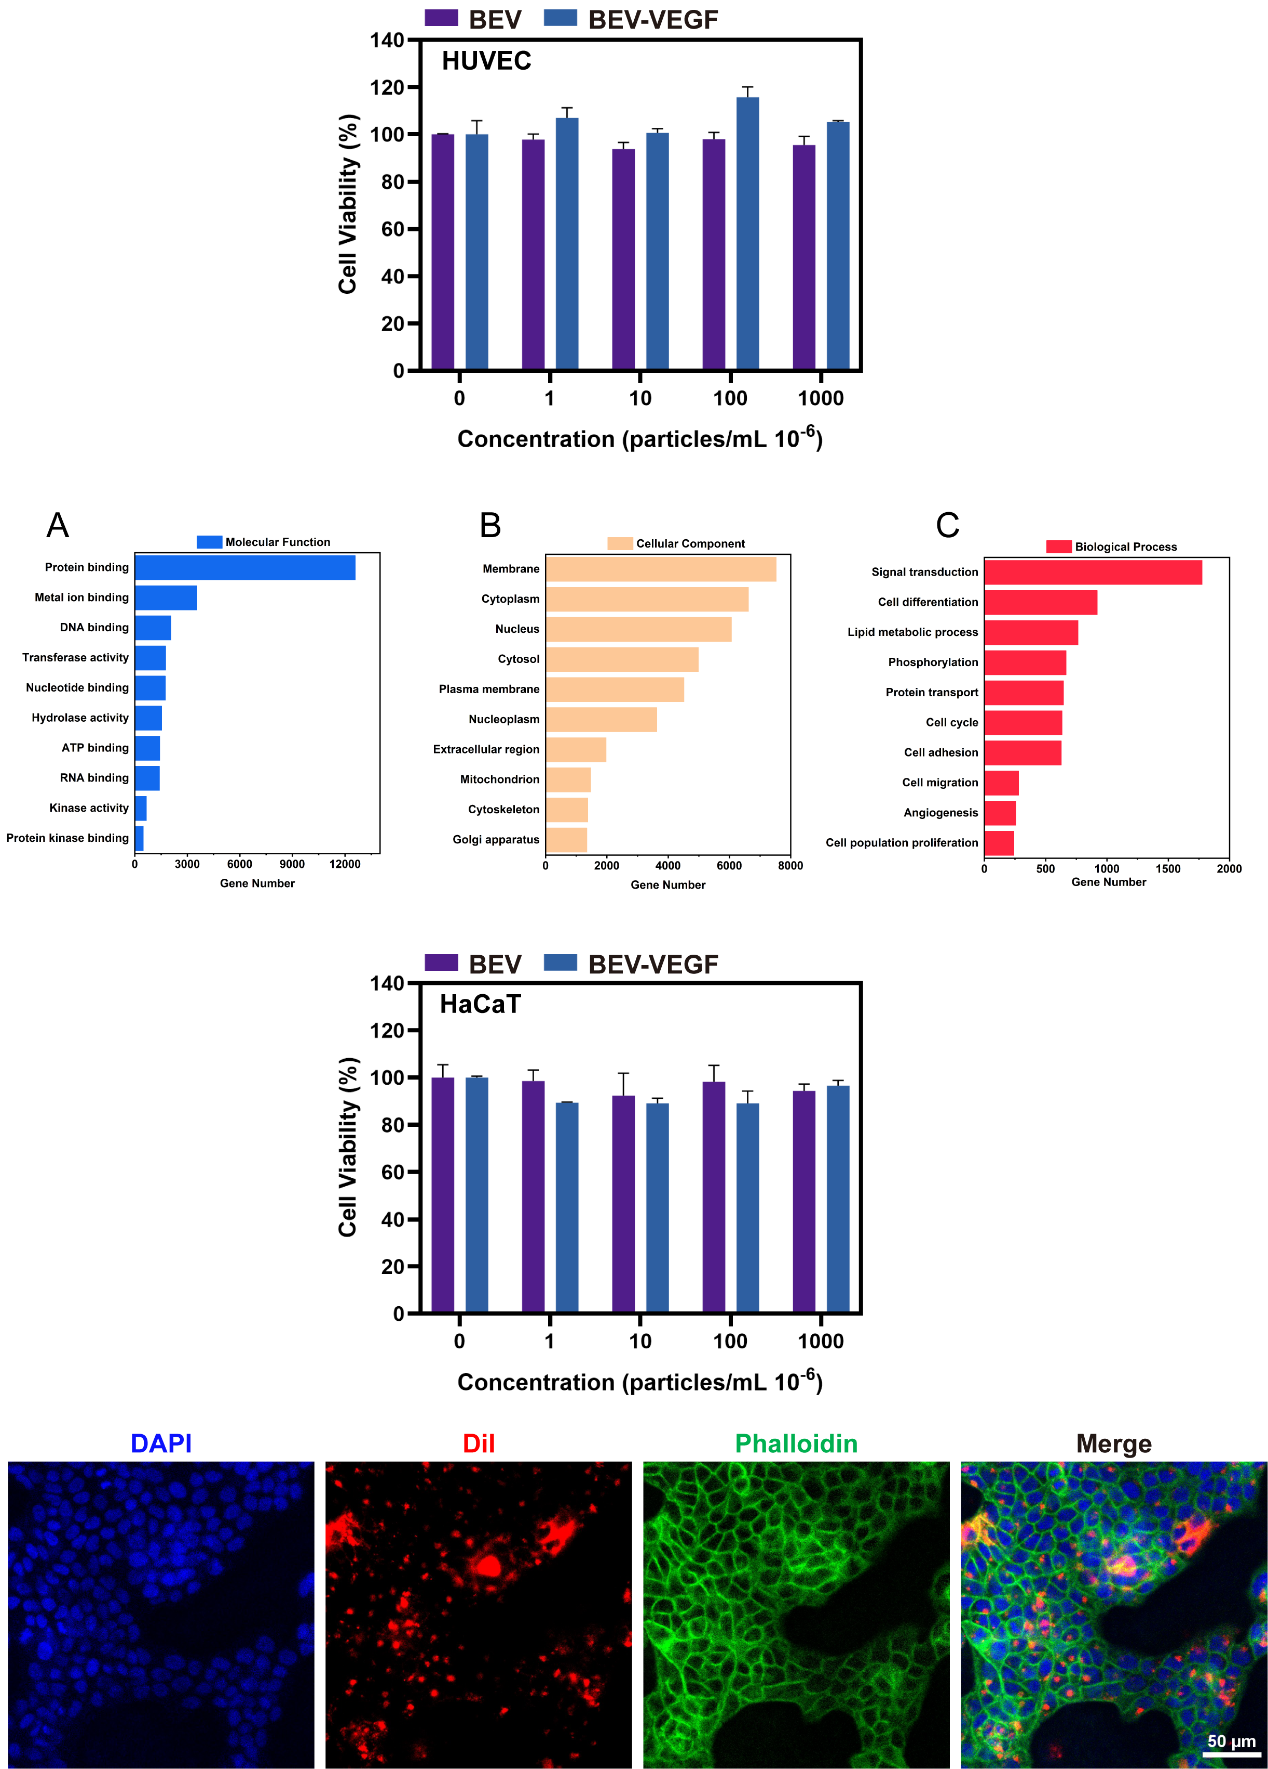


**Figure S6**. Representative internalization images of the DiI labeled BEV and BEV-pVEGF by the DAPI and Phalloidin stained HaCaT for 6 h.
